# Supplementary material for: Effect of pH on the Catalytic Degradation of Rhodamine B by Synthesized CDs/g-C3N4/CuxO Composites
Source: PubMed Central journal article supplement — ACS Omega. 2021 Mar 15;6(12):8119–30. doi: 10.1021/acsomega.0c05915 (PMC8014920; doi:10.1021/acsomega.0c05915), 2021-03-15
Supplement: ao0c05915_si_001.pdf [file ao0c05915_si_001.pdf]

## Supporting Information

### Effect of pH on the catalytic degradation of Rhodamine B by the synthesized CDs/g-C<sub>3</sub>N<sub>4</sub>/Cu<sub>x</sub>O composites

Yulian Guo, Chunsun Zhou, Lijuan Fang, Zhongda Liu, Wen Li, Miao Yang\*

School of Chemistry, Chemical Engineering and Life Sciences, Wuhan University of Technology, Wuhan 430070, China

Corresponding Author: M. Yang, [yangmiao@whut.edu.cn](mailto:yangmiao@whut.edu.cn)

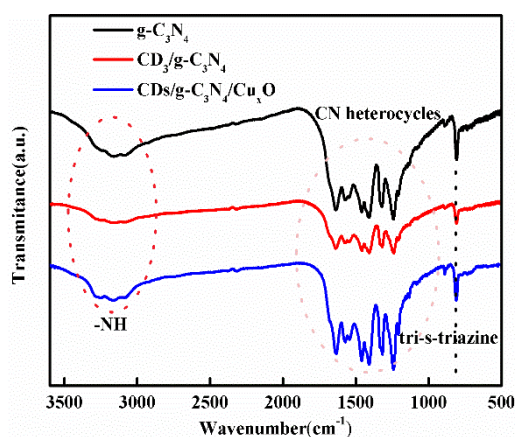

Figure S1. FT-IR spectra of g-C<sub>3</sub>N<sub>4</sub>, CD<sub>3</sub>/g-C<sub>3</sub>N<sub>4</sub>, and CDs/g-C<sub>3</sub>N<sub>4</sub>/Cu<sub>x</sub>O composite.

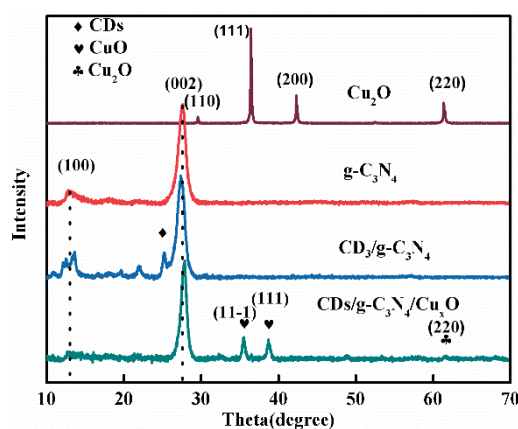

Figure S2. XRD patterns of Cu<sub>2</sub>O, g-C<sub>3</sub>N<sub>4</sub>, CD<sub>3</sub>/g-C<sub>3</sub>N<sub>4</sub> and CDs/g-C<sub>3</sub>N<sub>4</sub>/Cu<sub>x</sub>O composite.

**Table S1.** XPS results of the CDs/g-C<sub>3</sub>N<sub>4</sub>/Cu<sub>x</sub>O composite.

|       | Binding energy/eV | Chemical bonds                     |        | Binding energy/eV | Chemical bonds   |
|-------|-------------------|------------------------------------|--------|-------------------|------------------|
| C 1s  | 284.94            | C=C                                | N 1s   | 398.53            | C-N=C            |
|       | 287.90            | C-OH                               |        | 399.05            | N-C <sub>3</sub> |
|       | 288.31            | N-C=N                              |        | 400.73            | C-N-H            |
| Cu 2p | 933.10/952.95     | Cu <sup>+</sup> or Cu <sup>0</sup> | Cu LMM | 570.89            | Cu <sup>+</sup>  |
|       | 935.02/955.13     | Cu <sup>2+</sup>                   |        | 576.42            | Cu <sup>2+</sup> |
|       | 943.09/963.11     | Cu <sup>2+</sup> satellite peaks   |        |                   |                  |

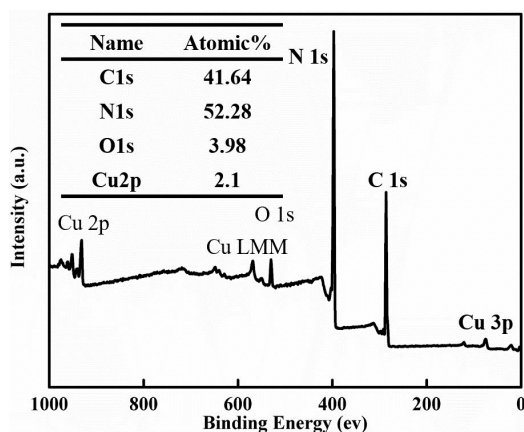

**Figure S3.** XPS spectra of CDs/g-C<sub>3</sub>N<sub>4</sub>/Cu<sub>x</sub>O composite

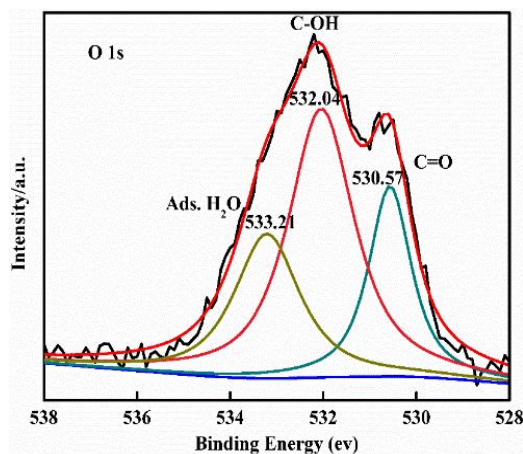

**Figure S4.** High-resolution XPS spectra of O1s

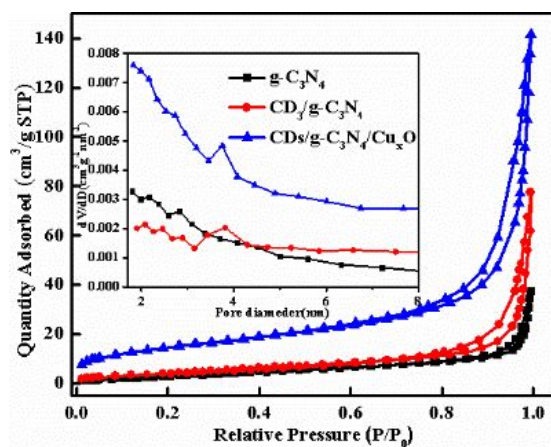

**Figure S5.** N<sub>2</sub> adsorption/desorption isotherm and the pore size distribution of g-C<sub>3</sub>N<sub>4</sub>, CD<sub>3</sub>/g-C<sub>3</sub>N<sub>4</sub>, CDs/g-C<sub>3</sub>N<sub>4</sub>/Cu<sub>x</sub>O.

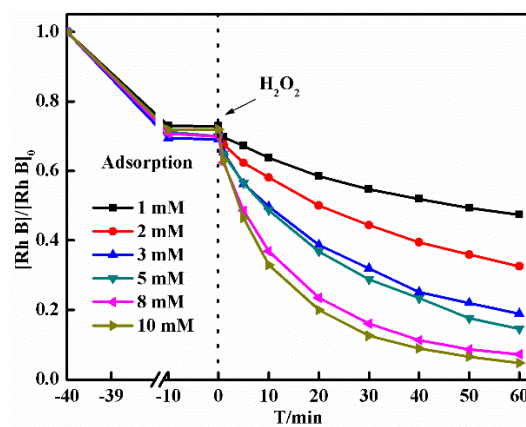

**Figure S6.** [Rh B]/[Rh B]<sub>0</sub> as a function of time with the different H<sub>2</sub>O<sub>2</sub> concentrations in the presence of 2 g/L CDs/g-C<sub>3</sub>N<sub>4</sub>/Cu<sub>x</sub>O composite with initial concentration of [Rh B]<sub>0</sub>=0.064 mM, and V=100 mL.

**Table S2.** Utilization of H<sub>2</sub>O<sub>2</sub> in the different H<sub>2</sub>O<sub>2</sub> concentrations

| [H <sub>2</sub> O <sub>2</sub> ] <sub>0</sub> (mM) | 1    | 2    | 3    | 5    | 8    | 10   |
|----------------------------------------------------|------|------|------|------|------|------|
| Degradation ratios (%)                             | 52.6 | 67.4 | 81.1 | 85.4 | 92.8 | 95.2 |
| Utilization (%)                                    | 4.1  | 3.1  | 2.1  | 3.3  | 2.1  | 2.5  |

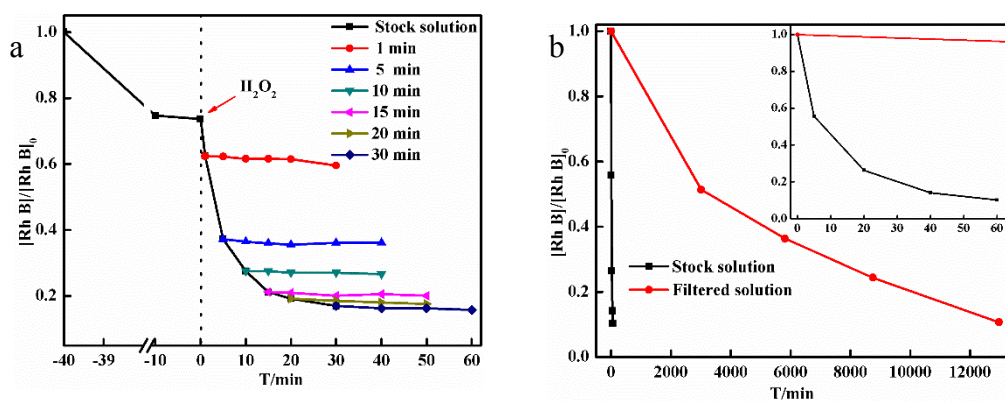

**Figure S7.** (a)  $[Rh B]/[Rh B]_0$  as a function of time in stock CDs/g- $C_3N_4/Cu_xO$  (2 g/L) suspensions and filtrates obtained at selected time intervals with initial concentration of  $[Rh B]_0=0.064$  mM,  $[H_2O_2]_0=5$  mM and  $V=100$  mL. (b) Degradation of RhB in heterogeneous catalytic reaction and filtered solution in 1 min reacting over a longer period of time.

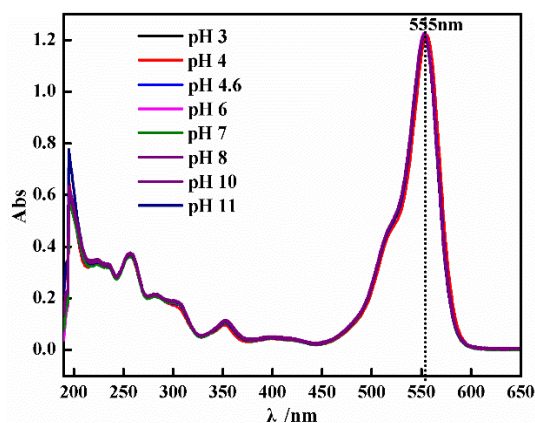

**Figure S8.** Variation of Rh B wavelength at different pH;

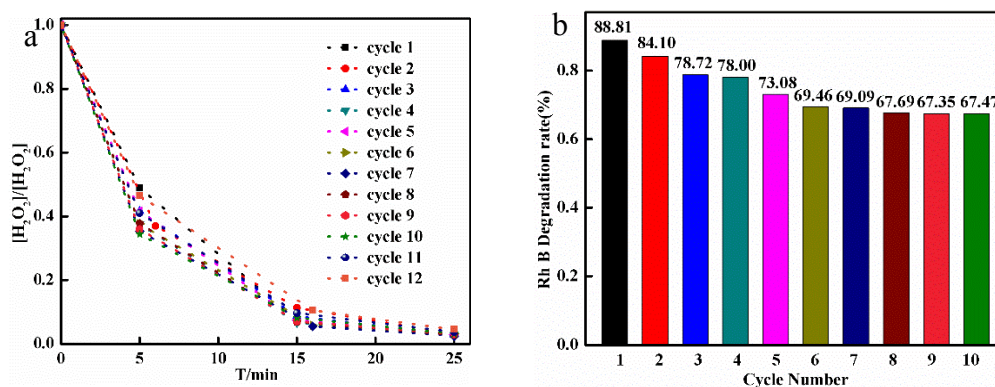

**Figure S9.** (a) Recycling performance for 5 mM  $H_2O_2$  decomposition in the presence of 2 g/L CDs/g- $C_3N_4/Cu_xO$  composite at pH 11 in 25 minutes per cycle, and  $V=100$  mL; (b) Recycling performance of the 2 g/L CDs/g- $C_3N_4/Cu_xO$  composite for Rh B (0.064 mM) degradation in the

presence of 5 mM H<sub>2</sub>O<sub>2</sub> at pH 11 in 30 minutes per cycle.

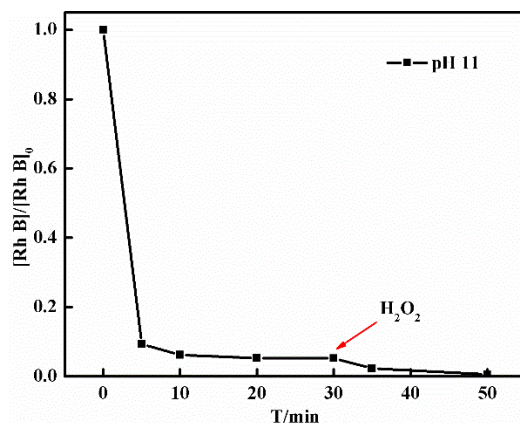

**Figure S10.**  $[\text{Rh B}]/[\text{Rh B}]_0$  as a function of time in the presence of the 2 g/L CDs/g-C<sub>3</sub>N<sub>4</sub>/Cu<sub>x</sub>O composite for Rh B (0.064 mM) degradation in the presence of 10 mM H<sub>2</sub>O<sub>2</sub> at pH 11.

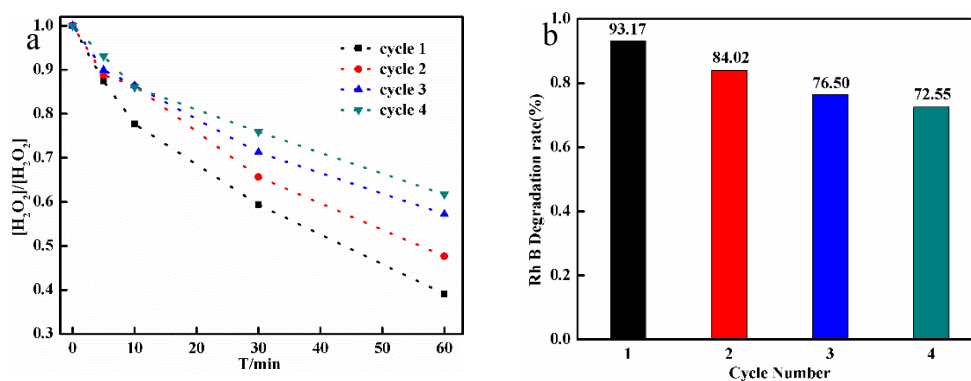

**Figure S11.** (a) H<sub>2</sub>O<sub>2</sub> consumed in cycling reactions by the 2 g/L CDs/g-C<sub>3</sub>N<sub>4</sub>/Cu<sub>x</sub>O composite for Rh B (0.064 mM) degradation in the presence of 5 mM H<sub>2</sub>O<sub>2</sub> at pH 4.6 (Unadjusted pH; V=100 mL); (b) The recycling degradation of the Rh B (0.064 mM) was conducted by 2 g/L CDs/g-C<sub>3</sub>N<sub>4</sub>/Cu<sub>x</sub>O composite in the presence of 5 mM H<sub>2</sub>O<sub>2</sub> at pH 4.6 (unadjusted pH; V=100 mL).



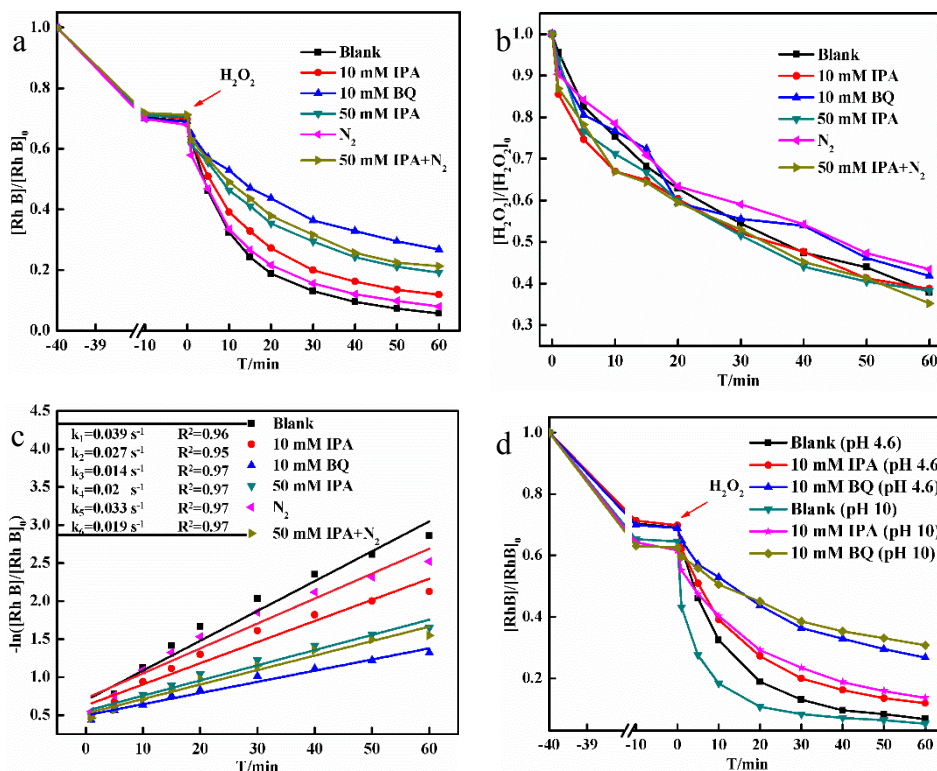

**Figure S12.**  $[\text{Rh B}]/[\text{Rh B}]_0$  (a) and  $[\text{H}_2\text{O}_2]/[\text{H}_2\text{O}_2]_0$  (b) as a function of time in the presence of different quenchers by the 2 g/L CDs/g- $\text{C}_3\text{N}_4/\text{Cu}_x\text{O}$  composite for Rh B (0.064 mM) degradation in the presence of 5 mM  $\text{H}_2\text{O}_2$ . (c) Parameters of the pseudo-first-order kinetic models of different quenchers by the 2 g/L CDs/g- $\text{C}_3\text{N}_4/\text{Cu}_x\text{O}$  composite for Rh B (0.064 mM) degradation in the presence of 5 mM  $\text{H}_2\text{O}_2$ . (d)  $[\text{Rh B}]/[\text{Rh B}]_0$  as a function of time in the presence of different quenchers by the 2 g/L CDs/g- $\text{C}_3\text{N}_4/\text{Cu}_x\text{O}$  composite for Rh B (0.064 mM) degradation in the presence of 5 mM  $\text{H}_2\text{O}_2$  in different pH.

**Table S3.** Comparison of the catalytic performance of CDs/g-C<sub>3</sub>N<sub>4</sub>/Cu<sub>x</sub>O and several reported relative studies.

| Fenton-like Catalysts                                  | Catalysts mg/mL | Pollutants                 | Cyclic degradation     | The application range of pH | Ref.      |
|--------------------------------------------------------|-----------------|----------------------------|------------------------|-----------------------------|-----------|
| CuNiFeLa-LDH                                           | 0.25            | Antibiotics<br>10 mg/L     | 4 times<br>96.8%-96.5% | natural pH                  | 58        |
| Cu-MP NCs                                              | 1               | Rh B<br>10 mg/L            | 6 times<br>99%-90%     | 2.62-10.42                  | 59        |
| Mn <sub>3</sub> O <sub>4</sub> .CuO                    | 1.9             | p-nitrophenol<br>10 mg/L   | 5 times<br>98%-78%     | 6-10                        | 60        |
| Cu/MnO <sub>2</sub>                                    | 0.5             | benzotriazole<br>5.96 mg/L | 5 times<br>90%-39%     | 3.4-10.57                   | 61        |
| CDs/g-C <sub>3</sub> N <sub>4</sub> /Cu <sub>x</sub> O | 2.0             | RhB<br>30 mg/L             | 8 times<br>99%-95%     | 3-11                        | This work |

**Table S4.** Reaction formulas and reaction rate constants of possible reactions in radical trapping.<sup>51, 53, 62</sup>

| Reaction formula                                                                       | Reaction rate constant                                  | Mark           |
|----------------------------------------------------------------------------------------|---------------------------------------------------------|----------------|
| •OH+BQ → BQ-•OH                                                                        | $k = 6.6 \times 10^9 \text{ M}^{-1} \text{ s}^{-1}$     | R <sub>1</sub> |
| •O <sub>2</sub> <sup>-</sup> +BQ → BQ-•O <sub>2</sub> <sup>-</sup>                     | $k = 0.9-1.0 \times 10^9 \text{ M}^{-1} \text{ s}^{-1}$ | R <sub>2</sub> |
| •OH+ IPA → IPA-•OH                                                                     | $k = 1.9 \times 10^9 \text{ M}^{-1} \text{ s}^{-1}$     | R <sub>3</sub> |
| •OH + •OH → H <sub>2</sub> O <sub>2</sub>                                              | $k = 5-8 \times 10^9 \text{ M}^{-1} \text{ s}^{-1}$     | R <sub>4</sub> |
| •OH + H <sub>2</sub> O <sub>2</sub> → •O <sub>2</sub> H                                | $k = 1.7-4.5 \times 10^7 \text{ M}^{-1} \text{ s}^{-1}$ | R <sub>5</sub> |
| •O <sub>2</sub> H + •O <sub>2</sub> H → H <sub>2</sub> O <sub>2</sub> + O <sub>2</sub> | $k = 0.8-2.2 \times 10^6 \text{ M}^{-1} \text{ s}^{-1}$ | R <sub>6</sub> |
| •OH + •O <sub>2</sub> H → H <sub>2</sub> O + O <sub>2</sub>                            | $k = 1.4 \times 10^{10} \text{ M}^{-1} \text{ s}^{-1}$  | R <sub>7</sub> |

**Table S5.** The initial mass ratio of Cu<sub>2</sub>O to CDs/g-C<sub>3</sub>N<sub>4</sub> for CDs/g-C<sub>3</sub>N<sub>4</sub>/Cu<sub>x</sub>O composites.

| S.NO | Sample code | wt% of Cu <sub>2</sub> O |
|------|-------------|--------------------------|
| 0.5  | C1          | 1.3                      |
| 1    | C2          | 2.8                      |
| 2    | C3          | 5.4                      |
| 3    | C4          | 7.9                      |
| 4    | C5          | 10.0                     |
| 5    | C6          | 12.5                     |
